# Supplementary figures and images for: De novo and inherited CNVs in MZ twin pairs selected for discordance and concordance on Attention Problems
Source: PubMed Central journal article supplement — Eur J Hum Genet. 2012 Apr 11;20(10):1037–43. doi: 10.1038/ejhg.2012.49 (PMC3449078; doi:10.1038/ejhg.2012.49), 2012-04-11

**A**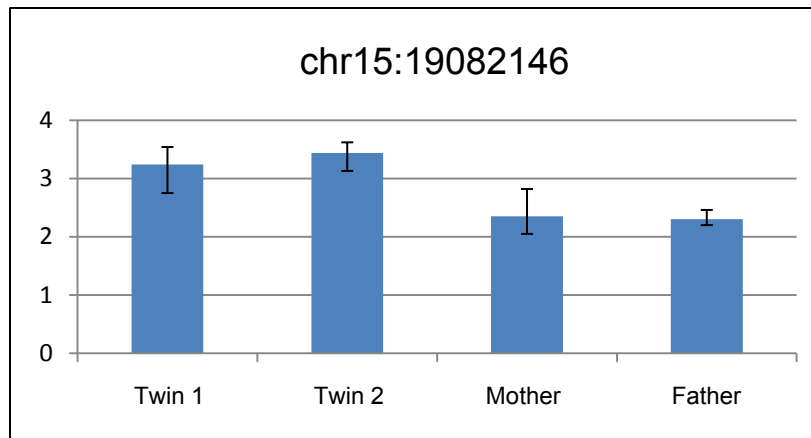**B**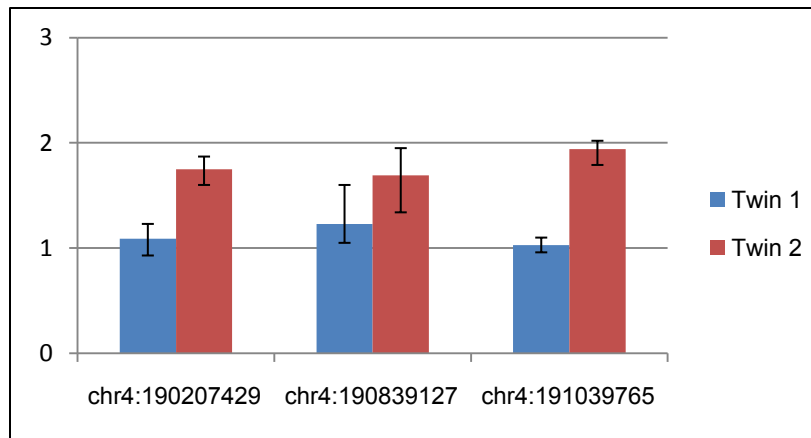**C**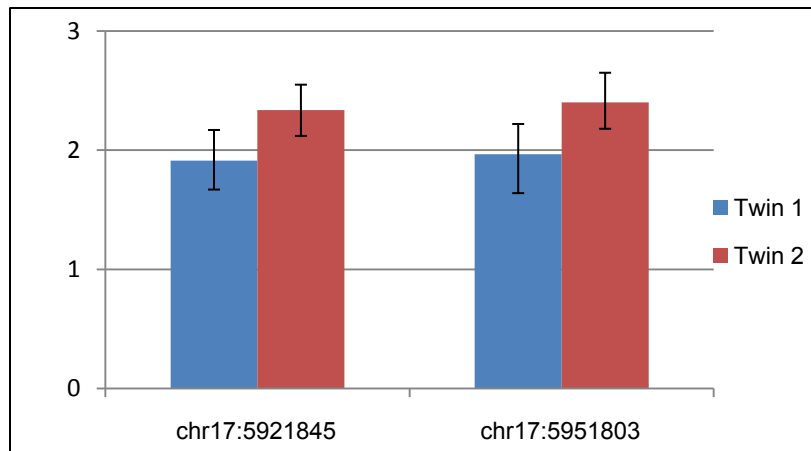

Supplement: ejhg201249x2.pdf [file ejhg201249x2.pdf]

**A**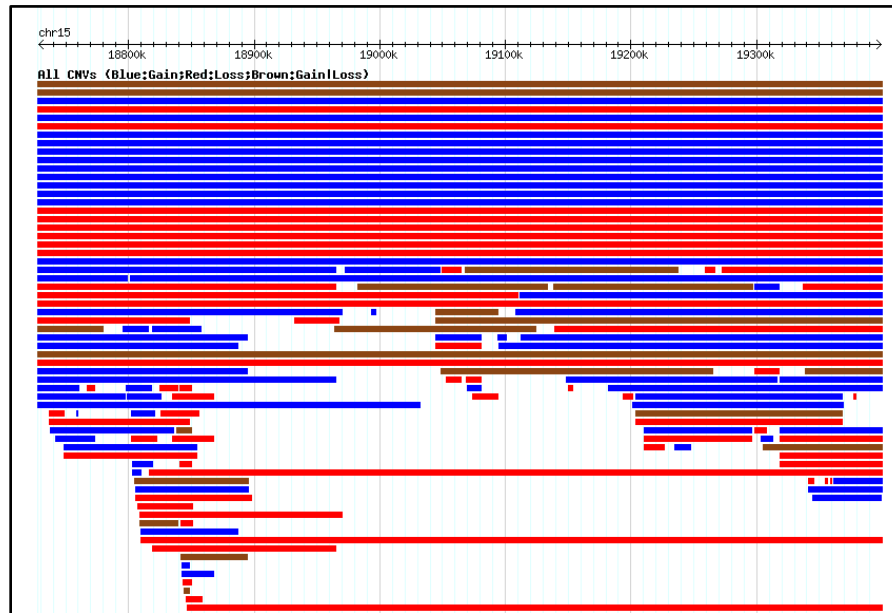**B**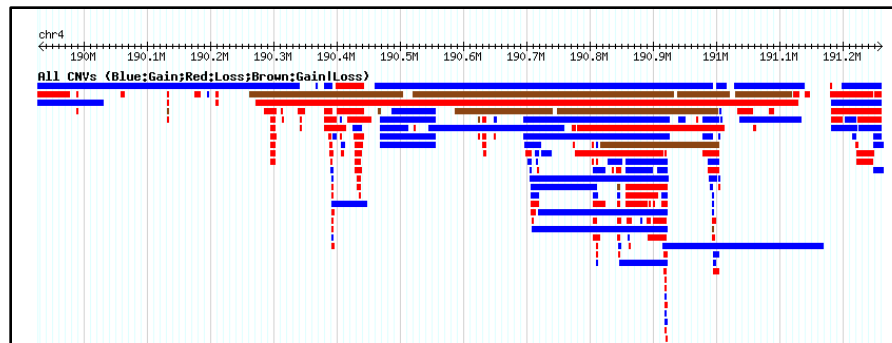**C**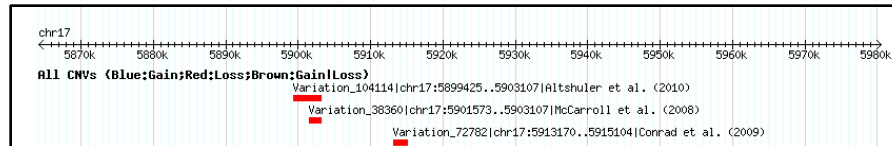

Supplement: ejhg201249x3.pdf [file ejhg201249x3.pdf]
